# Supplementary material for: ESR-thermochronometry of the Hida range of the Japanese Alps: Validation and future potential
Source: Copernicus journal article supplement (doi:10.5194/gchron-2019-6), 2019-06-26
Supplement: Supplementary file 1 [file Supplementary Material.xlsx]

## Sheet: Contents
	Supplementary Information to "ESR-thermochronometry of the Hida range of the Japanese Alps: Validation and future potential"
	Georgina E. King, Sumiko Tsukamoto, Frédéric Herman, Rabiul Biswas, Shigeru Sueoka and Takahiro Tagami
	OSL sample screening for saturation.
	OSL-thermochronometry Raw Data.
	KRG16-05
	KRG16-06
	KRG16-101
	KRG16-104
	KRG16-111
	KRG16-112
	ESR-thermochronometry Raw Data.
	KRG16-05 Al & Ti-centres
	KRG16-06 Al & Ti-centres
	KRG16-101 Al & Ti-centres
	KRG16-104 Al & Ti-centres (4.3 kGy isothermal holding experiment)
	KRG16-104 Al & Ti-centres (2.15 kGy isothermal holding experiment)
	KRG16-111 Al & Ti-centres
	KRG16-112 Al & Ti-centres
	Dosimetry data.

## Sheet: KRG05 IR50
Sample KRG05
Natural T (°C)
Natural Ḋ (Gy/ka)			8.56	1.169
Lab calibration:
T (°C)	15	t (ks)	Nat	0	0.25	0.5	1.5	3	6	12	24	48	0	0.25
Ḋ (Gy/s)	0.105	Lx/Tx	2.05886	0.00171339	0.256401	0.498101	1.31423	2.1933	3.49944	4.95759	6.02438	6.73121	0.00796759	0.268126
T (°C)	15	t (ks)	Nat	0	0.25	0.5	1.5	3	6	12	24	48	0	0.25
Ḋ (Gy/s)	0.105	Lx/Tx	2.59262	0.00265144	0.277285	0.514154	1.29782	2.22666	3.32109	4.50615	5.44836	5.78639	0.00853183	0.275911
T (°C)	15	t (ks)	Nat	0	0.25	0.5	1.5	3	6	12	24	48	0	0.25
Ḋ (Gy/s)	0.105	Lx/Tx	3.06815	0.00303607	0.264168	0.502996	1.31398	2.2786	3.52513	4.76938	5.81482	6.39472	0.00898977	0.275438
T (°C)	170	t (ks)	0	0.01	0.02	0.04	0.08	0.16	0.32	0.64	1.28	2.56	5.12	10.24
Ḋ (Gy/s)	0	Lx/Tx	0.941143	0.954274	0.922693	0.933391	0.953773	0.946737	0.89023	0.917993	0.887945	0.864639	0.81529	0.757434
T (°C)	190	t (ks)	0	0.01	0.02	0.04	0.08	0.16	0.32	0.64	1.28	2.56	5.12	10.24
Ḋ (Gy/s)	0	Lx/Tx	0.947002	0.925604	0.938156	0.933396	0.941964	0.925246	0.903137	0.897138	0.836533	0.783439	0.684387	0.585101
T (°C)	210	t (ks)	0	0.01	0.02	0.04	0.08	0.16	0.32	0.64	1.28	2.56	5.12	10.24
Ḋ (Gy/s)	0	Lx/Tx	0.950815	0.938173	0.92709	0.930711	0.909468	0.895964	0.862165	0.78758	0.694173	0.588585	0.464072	0.34582
T (°C)	230	t (ks)	0	0.01	0.02	0.04	0.08	0.16	0.32	0.64	1.28	2.56	5.12	10.24
Ḋ (Gy/s)	0	Lx/Tx	0.940529	0.935697	0.919656	0.907478	0.835667	0.822496	0.707627	0.587766	0.462247	0.337778	0.226292	0.142368
T (°C)	250	t (ks)	0	0.01	0.02	0.04	0.08	0.16	0.32	0.64	1.28	2.56	5.12	10.24
Ḋ (Gy/s)	0	Lx/Tx	0.927526	0.898305	0.861447	0.815426	0.713887	0.608745	0.479152	0.344969	0.234918	0.145447	0.0817657	0.0455743
T (°C)	300	t (ks)	0	0.01	0.02	0.04	0.08	0.16	0.32	0.64	1.28	2.56	5.12	10.24
Ḋ (Gy/s)	0	Lx/Tx	0.693388	0.499871	0.40028	0.295448	0.203869	0.116191	0.0635362	0.0303904	0.0141306	0.00542422	0.00152397	0.00185617
T (°C)	350	t (ks)	0	0.01	0.02	0.04	0.08	0.16	0.32	0.64
Ḋ (Gy/s)	0	Lx/Tx	0.231743	0.100344	0.0582531	0.0316762	0.014443	0.00658745	0.00403915	0.00189757
T (°C)	15	t (ks)	0.6336	12.5352	18.558	30.5964	54.666	0.6336	19576.9	0.6372
Ḋ (Gy/s)	0	Lx/Tx	0.955612	0.865603	0.855884	0.846932	0.861154	0.905	0.736	0.954
T (°C)	15	t (ks)	0.6336	14.0256	20.0448	32.0868	56.1564	0.6336	980.502	0.6336	19578.4	0.6372
Ḋ (Gy/s)	0	Lx/Tx	0.945089	0.901242	0.880839	0.892548	0.877448	0.945249	0.453	0.951	0.753	0.957
T (°C)	15	t (ks)	0.6336	15.516	21.5352	33.5772	57.6468	0.6336	982.031	0.6336	19579.9	0.6372
Ḋ (Gy/s)	0	Lx/Tx	0.943598	0.893391	0.890893	0.8566	0.860879	0.965808	0.453	0.951	0.746	0.956

## Sheet: KRG05 IR100
Sample KRG05
Natural T (°C)
Natural Ḋ (Gy/ka)			8.56	1.169
Lab calibration:
T (°C)	15	t (ks)	Nat	0	0.25	0.5	1.5	3	6	12	24	48	0	0.25
Ḋ (Gy/s)	0.105	Lx/Tx	3.34466	0.00764879	0.269209	0.507748	1.32385	2.20739	3.44218	4.7502	5.84099	6.27677	0.0247309	0.261207
T (°C)	15	t (ks)	Nat	0	0.25	0.5	1.5	3	6	12	24	48	0	0.25
Ḋ (Gy/s)	0.105	Lx/Tx	3.57161	0.0117847	0.268304	0.498924	1.2785	2.23491	3.49058	4.8851	5.85115	6.15977	0.0221399	0.273429
T (°C)	15	t (ks)	Nat	0	0.25	0.5	1.5	3	6	12	24	48	0	0.25
Ḋ (Gy/s)	0.105	Lx/Tx	2.59891	0.0107023	0.269279	0.508555	1.33773	2.22134	3.57141	4.97102	6.08465	6.60525	0.0229713	0.262904
T (°C)	170	t (ks)	0	0.01	0.02	0.04	0.08	0.16	0.32	0.64	1.28	2.56	5.12	10.24
Ḋ (Gy/s)	0	Lx/Tx	0.957047	0.984438	0.921961	0.987468	0.935312	0.94384	0.889458	0.948392	0.939453	0.917036	0.889283	0.858763
T (°C)	190	t (ks)	0	0.01	0.02	0.04	0.08	0.16	0.32	0.64	1.28	2.56	5.12	10.24
Ḋ (Gy/s)	0	Lx/Tx	0.935102	0.908869	0.956127	0.941228	0.922041	0.90308	0.941434	0.928049	0.863356	0.848899	0.83661	0.781147
T (°C)	210	t (ks)	0	0.01	0.02	0.04	0.08	0.16	0.32	0.64	1.28	2.56	5.12	10.24
Ḋ (Gy/s)	0	Lx/Tx	0.939512	0.948552	0.920394	0.939539	0.951523	0.902237	0.925593	0.86816	0.836209	0.764451	0.695496	0.631982
T (°C)	230	t (ks)	0	0.01	0.02	0.04	0.08	0.16	0.32	0.64	1.28	2.56	5.12	10.24
Ḋ (Gy/s)	0	Lx/Tx	0.950766	0.915332	0.923328	0.896658	0.894764	0.922627	0.852449	0.774696	0.695135	0.609122	0.504661	0.396259
T (°C)	250	t (ks)	0	0.01	0.02	0.04	0.08	0.16	0.32	0.64	1.28	2.56	5.12	10.24
Ḋ (Gy/s)	0	Lx/Tx	0.922728	0.944274	0.953946	0.890038	0.856383	0.776045	0.741951	0.610716	0.494221	0.403619	0.266504	0.187999
T (°C)	300	t (ks)	0	0.01	0.02	0.04	0.08	0.16	0.32	0.64	1.28	2.56	5.12	10.24
Ḋ (Gy/s)	0	Lx/Tx	0.824007	0.72361	0.680754	0.592975	0.513221	0.364763	0.2667	0.170013	0.108276	0.0519975	0.0366677	0.00895544
T (°C)	350	t (ks)	0	0.01	0.02	0.04	0.08	0.16	0.32	0.64
Ḋ (Gy/s)	0	Lx/Tx	0.54431	0.383234	0.27077	0.199278	0.11167	0.0676474	0.0392546	0.0172754
T (°C)	15	t (ks)	0.7848	12.6756	18.6984	30.7332	54.8064	0.7884	0.7848	19577	0.7884
Ḋ (Gy/s)	0	Lx/Tx	0.951585	0.904659	0.92036	0.899931	0.939914	0.923972	0.899	0.556	0.95
T (°C)	15	t (ks)	0.7884	14.1624	20.1852	32.2236	56.2932	0.7884	980.64	0.7848	19578.5	0.7884
Ḋ (Gy/s)	0	Lx/Tx	0.933725	0.91416	0.899314	0.919474	0.895186	0.937264	0.802	0.941	0.797	0.98
T (°C)	15	t (ks)	0.7848	15.6528	21.672	33.7176	57.7836	0.7884	982.169	0.7848	19580	0.7884
Ḋ (Gy/s)	0	Lx/Tx	0.932952	0.916327	0.900304	0.894798	0.902417	0.95985	0.817	0.936	0.788	0.955

## Sheet: KRG05 IR150
Sample KRG05
Natural T (°C)
Natural Ḋ (Gy/ka)			8.56	1.169
Lab calibration:
T (°C)	15	t (ks)	Nat	0	0.25	0.5	1.5	3	6	12	24	48	0	0.25
Ḋ (Gy/s)	0.105	Lx/Tx	4.03733	0.0151989	0.241574	0.466922	1.31624	2.25523	3.54079	5.00455	6.09881	6.60751	0.0349097	0.256839
T (°C)	15	t (ks)	Nat	0	0.25	0.5	1.5	3	6	12	24	48	0	0.25
Ḋ (Gy/s)	0.105	Lx/Tx	4.072	0.0146426	0.269102	0.496306	1.31121	2.24685	3.45747	4.88546	5.99128	6.58043	0.0295183	0.27304
T (°C)	15	t (ks)	Nat	0	0.25	0.5	1.5	3	6	12	24	48	0	0.25
Ḋ (Gy/s)	0.105	Lx/Tx	4.93519	0.0140637	0.264899	0.493994	1.3389	2.22438	3.5954	5.00555	6.20053	6.78627	0.0303026	0.275
T (°C)	170	t (ks)	0	0.01	0.02	0.04	0.08	0.16	0.32	0.64	1.28	2.56	5.12	10.24
Ḋ (Gy/s)	0	Lx/Tx	0.930783	0.96401	0.921708	0.935901	0.923188	0.977509	0.926613	0.914791	0.939973	0.905088	0.861874	0.872225
T (°C)	190	t (ks)	0	0.01	0.02	0.04	0.08	0.16	0.32	0.64	1.28	2.56	5.12	10.24
Ḋ (Gy/s)	0	Lx/Tx	0.928797	0.917274	0.935398	0.98234	0.953534	0.947802	0.909108	0.901194	0.87157	0.919042	0.84798	0.842388
T (°C)	210	t (ks)	0	0.01	0.02	0.04	0.08	0.16	0.32	0.64	1.28	2.56	5.12	10.24
Ḋ (Gy/s)	0	Lx/Tx	0.888464	0.931174	0.937118	0.958269	0.88823	0.934453	0.938982	0.888504	0.849041	0.873886	0.774288	0.713304
T (°C)	230	t (ks)	0	0.01	0.02	0.04	0.08	0.16	0.32	0.64	1.28	2.56	5.12	10.24
Ḋ (Gy/s)	0	Lx/Tx	0.943	0.978366	0.899457	0.963359	0.938023	0.950351	0.89976	0.834218	0.809121	0.764339	0.62302	0.545918
T (°C)	250	t (ks)	0	0.01	0.02	0.04	0.08	0.16	0.32	0.64	1.28	2.56	5.12	10.24
Ḋ (Gy/s)	0	Lx/Tx	0.904934	0.912435	0.942129	0.920844	0.868201	0.851	0.817568	0.756182	0.649138	0.606568	0.444279	0.351132
T (°C)	300	t (ks)	0	0.01	0.02	0.04	0.08	0.16	0.32	0.64	1.28	2.56	5.12	10.24
Ḋ (Gy/s)	0	Lx/Tx	0.907462	0.846616	0.828689	0.713776	0.6412	0.522683	0.477123	0.351567	0.249612	0.173239	0.12153	0.063188
T (°C)	350	t (ks)	0	0.01	0.02	0.04	0.08	0.16	0.32	0.64
Ḋ (Gy/s)	0	Lx/Tx	0.622142	0.508506	0.453304	0.36925	0.284671	0.201029	0.131312	0.0701086
T (°C)	15	t (ks)	0.954	12.834	18.8568	30.8952	54.9648	0.954	19577.2	0.9648
Ḋ (Gy/s)	0	Lx/Tx	0.925342	0.877798	0.940965	0.904782	0.918398	0.906	0.652	0.912
T (°C)	15	t (ks)	0.9576	14.3244	20.3472	32.3856	56.4552	0.9576	980.799	0.954	19578.7	0.9648
Ḋ (Gy/s)	0	Lx/Tx	0.90568	0.918041	0.922278	0.918882	0.900386	0.943624	0.954	0.913	0.842	0.93
T (°C)	15	t (ks)	0.9576	15.8148	21.834	33.8796	57.9456	0.9576	982.328	0.954	19580.2	0.9648
Ḋ (Gy/s)	0	Lx/Tx	0.914913	0.911413	0.91301	0.889224	0.905951	0.948623	0.922	0.943	0.832	0.932

## Sheet: KRG05 IR225
Sample KRG05
Natural T (°C)
Natural Ḋ (Gy/ka)			8.56	1.169
Lab calibration:
T (°C)	15	t (ks)	Nat	0	0.25	0.5	1.5	3	6	12	24	48	0	0.25
Ḋ (Gy/s)	0.105	Lx/Tx	3.62404	0.0171293	0.273122	0.472977	1.24432	2.01497	3.09887	4.15216	5.04441	5.34594	0.0315226	0.271193
T (°C)	15	t (ks)	Nat	0	0.25	0.5	1.5	3	6	12	24	48	0	0.25
Ḋ (Gy/s)	0.105	Lx/Tx	3.66887	0.0177446	0.273041	0.495047	1.24452	2.03713	3.09541	4.18402	4.95133	5.35928	0.031232	0.276552
T (°C)	15	t (ks)	Nat	0	0.25	0.5	1.5	3	6	12	24	48	0	0.25
Ḋ (Gy/s)	0.105	Lx/Tx	4.02815	0.0170377	0.272781	0.504992	1.24729	2.06335	3.14835	4.24979	5.09243	5.47161	0.0315571	0.283852
T (°C)	170	t (ks)	0	0.01	0.02	0.04	0.08	0.16	0.32	0.64	1.28	2.56	5.12	10.24
Ḋ (Gy/s)	0	Lx/Tx	0.902113	0.905526	0.904097	0.924306	0.904969	0.89317	0.909536	0.894669	0.888178	0.889844	0.883986	0.857866
T (°C)	190	t (ks)	0	0.01	0.02	0.04	0.08	0.16	0.32	0.64	1.28	2.56	5.12	10.24
Ḋ (Gy/s)	0	Lx/Tx	0.930399	0.889399	0.857914	0.907979	0.901566	0.896109	0.902867	0.880623	0.871719	0.875713	0.834215	0.791152
T (°C)	210	t (ks)	0	0.01	0.02	0.04	0.08	0.16	0.32	0.64	1.28	2.56	5.12	10.24
Ḋ (Gy/s)	0	Lx/Tx	0.897278	0.896137	0.881512	0.903145	0.885809	0.893402	0.891178	0.874973	0.836433	0.822254	0.769132	0.712311
T (°C)	230	t (ks)	0	0.01	0.02	0.04	0.08	0.16	0.32	0.64	1.28	2.56	5.12	10.24
Ḋ (Gy/s)	0	Lx/Tx	0.949072	0.894763	0.867871	0.893831	0.889658	0.880267	0.831351	0.826935	0.76831	0.732675	0.69838	0.613921
T (°C)	250	t (ks)	0	0.01	0.02	0.04	0.08	0.16	0.32	0.64	1.28	2.56	5.12	10.24
Ḋ (Gy/s)	0	Lx/Tx	0.911914	0.903501	0.897167	0.867258	0.852625	0.8554	0.777845	0.733404	0.659516	0.635938	0.547187	0.482739
T (°C)	300	t (ks)	0	0.01	0.02	0.04	0.08	0.16	0.32	0.64	1.28	2.56	5.12	10.24
Ḋ (Gy/s)	0	Lx/Tx	0.827675	0.810907	0.805281	0.727416	0.674151	0.616109	0.54748	0.452171	0.4349	0.337418	0.265279	0.198916
T (°C)	350	t (ks)	0	0.01	0.02	0.04	0.08	0.16	0.32	0.64
Ḋ (Gy/s)	0	Lx/Tx	0.678008	0.59818	0.539277	0.497645	0.424017	0.360135	0.284675	0.202333
T (°C)	15	t (ks)	1.1484	13.0212	19.0404	31.0788	55.152	1.152	1.1484	1.1556
Ḋ (Gy/s)	0	Lx/Tx	0.90182	0.883736	0.903507	0.885022	0.892199	0.877701	0.867	0.906
T (°C)	15	t (ks)	1.1484	14.5116	20.5308	32.5692	56.6388	1.152	980.983	1.1484	19578.9	1.1556
Ḋ (Gy/s)	0	Lx/Tx	0.911951	0.89782	0.884236	0.900207	0.904513	0.902178	0.882	0.911	0.842	0.921
T (°C)	15	t (ks)	1.1484	16.002	22.0176	34.0632	58.1328	1.152	982.512	1.1448	19580.4	1.1592
Ḋ (Gy/s)	0	Lx/Tx	0.884159	0.894938	0.881944	0.871731	0.873669	0.915939	0.861	0.901	0.827	0.901

## Sheet: KRG06 IR50
Sample KRG06
Natural T (°C)
Natural Ḋ (Gy/ka)			5.44	0.123
Lab calibration:
T (°C)	15	t (ks)	Nat	0	0.25	0.5	1.5	3	6	12	24	48	0	0.25
Ḋ (Gy/s)	0.105	Lx/Tx	0.727461	0.00101076	0.302906	0.565062	1.30282	2.11343	3.21115	4.26086	5.14591	5.83312	0.00858692	0.305317
T (°C)	15	t (ks)	Nat	0	0.25	0.5	1.5	3	6	12	24	48	0	0.25
Ḋ (Gy/s)	0.105	Lx/Tx	0.806793	0.00107863	0.308203	0.569615	1.32251	2.09223	2.98414	3.94455	4.75709	5.22993	0.00785139	0.310818
T (°C)	15	t (ks)	Nat	0	0.25	0.5	1.5	3	6	12	24	48	0	0.25
Ḋ (Gy/s)	0.105	Lx/Tx	0.741277	0.000479761	0.318894	0.559435	1.32352	2.05616	2.99463	4.03629	4.75621	5.20735	0.00365154	0.304989
T (°C)	170	t (ks)	0	0.01	0.02	0.04	0.08	0.16	0.32	0.64	1.28	2.56	5.12	10.24
Ḋ (Gy/s)	0	Lx/Tx	0.941143	0.954274	0.922693	0.933391	0.953773	0.946737	0.89023	0.917993	0.887945	0.864639	0.81529	0.757434
T (°C)	190	t (ks)	0	0.01	0.02	0.04	0.08	0.16	0.32	0.64	1.28	2.56	5.12	10.24
Ḋ (Gy/s)	0	Lx/Tx	0.947002	0.925604	0.938156	0.933396	0.941964	0.925246	0.903137	0.897138	0.836533	0.783439	0.684387	0.585101
T (°C)	210	t (ks)	0	0.01	0.02	0.04	0.08	0.16	0.32	0.64	1.28	2.56	5.12	10.24
Ḋ (Gy/s)	0	Lx/Tx	0.950815	0.938173	0.92709	0.930711	0.909468	0.895964	0.862165	0.78758	0.694173	0.588585	0.464072	0.34582
T (°C)	230	t (ks)	0	0.01	0.02	0.04	0.08	0.16	0.32	0.64	1.28	2.56	5.12	10.24
Ḋ (Gy/s)	0	Lx/Tx	0.940529	0.935697	0.919656	0.907478	0.835667	0.822496	0.707627	0.587766	0.462247	0.337778	0.226292	0.142368
T (°C)	250	t (ks)	0	0.01	0.02	0.04	0.08	0.16	0.32	0.64	1.28	2.56	5.12	10.24
Ḋ (Gy/s)	0	Lx/Tx	0.927526	0.898305	0.861447	0.815426	0.713887	0.608745	0.479152	0.344969	0.234918	0.145447	0.0817657	0.0455743
T (°C)	300	t (ks)	0	0.01	0.02	0.04	0.08	0.16	0.32	0.64	1.28	2.56	5.12	10.24
Ḋ (Gy/s)	0	Lx/Tx	0.693388	0.499871	0.40028	0.295448	0.203869	0.116191	0.0635362	0.0303904	0.0141306	0.00542422	0.00152397	0.00185617
T (°C)	350	t (ks)	0	0.01	0.02	0.04	0.08	0.16	0.32	0.64
Ḋ (Gy/s)	0	Lx/Tx	0.231743	0.100344	0.0582531	0.0316762	0.014443	0.00658745	0.00403915	0.00189757
T (°C)	15	t (ks)	1.202	17.509	23.526	35.572	59.642	1.202
Ḋ (Gy/s)	0	Lx/Tx	0.958551	0.853407	0.844847	0.826213	0.787815	0.968039
T (°C)	15	t (ks)	1.202	18.999	25.016	37.063	61.135	1.202
Ḋ (Gy/s)	0	Lx/Tx	0.992852	0.858115	0.8405	0.820002	0.804151	0.975943
T (°C)	15	t (ks)	1.202	20.491	26.506	38.554	62.628	1.203
Ḋ (Gy/s)	0	Lx/Tx	0.987429	0.842177	0.835123	0.823947	0.784577	0.980773

## Sheet: KRG06 IR100
Sample KRG06
Natural T (°C)
Natural Ḋ (Gy/ka)			5.44	0.123
Lab calibration:
T (°C)	15	t (ks)	Nat	0	0.25	0.5	1.5	3	6	12	24	48	0	0.25
Ḋ (Gy/s)	0.105	Lx/Tx	0.821938	0.00431067	0.280619	0.500201	1.33999	2.21424	3.62918	4.94	6.32877	7.22188	0.0175906	0.280841
T (°C)	15	t (ks)	Nat	0	0.25	0.5	1.5	3	6	12	24	48	0	0.25
Ḋ (Gy/s)	0.105	Lx/Tx	0.915812	0.00334758	0.280662	0.528682	1.33871	2.16006	3.30344	4.53638	5.65883	6.52173	0.0141156	0.273704
T (°C)	15	t (ks)	Nat	0	0.25	0.5	1.5	3	6	12	24	48	0	0.25
Ḋ (Gy/s)	0.105	Lx/Tx	0.824221	0.00116427	0.292691	0.536694	1.29407	2.1946	3.39227	4.84149	5.85558	6.73939	0.00828702	0.286197
T (°C)	170	t (ks)	0	0.01	0.02	0.04	0.08	0.16	0.32	0.64	1.28	2.56	5.12	10.24
Ḋ (Gy/s)	0	Lx/Tx	0.957047	0.984438	0.921961	0.987468	0.935312	0.94384	0.889458	0.948392	0.939453	0.917036	0.889283	0.858763
T (°C)	190	t (ks)	0	0.01	0.02	0.04	0.08	0.16	0.32	0.64	1.28	2.56	5.12	10.24
Ḋ (Gy/s)	0	Lx/Tx	0.935102	0.908869	0.956127	0.941228	0.922041	0.90308	0.941434	0.928049	0.863356	0.848899	0.83661	0.781147
T (°C)	210	t (ks)	0	0.01	0.02	0.04	0.08	0.16	0.32	0.64	1.28	2.56	5.12	10.24
Ḋ (Gy/s)	0	Lx/Tx	0.939512	0.948552	0.920394	0.939539	0.951523	0.902237	0.925593	0.86816	0.836209	0.764451	0.695496	0.631982
T (°C)	230	t (ks)	0	0.01	0.02	0.04	0.08	0.16	0.32	0.64	1.28	2.56	5.12	10.24
Ḋ (Gy/s)	0	Lx/Tx	0.950766	0.915332	0.923328	0.896658	0.894764	0.922627	0.852449	0.774696	0.695135	0.609122	0.504661	0.396259
T (°C)	250	t (ks)	0	0.01	0.02	0.04	0.08	0.16	0.32	0.64	1.28	2.56	5.12	10.24
Ḋ (Gy/s)	0	Lx/Tx	0.922728	0.944274	0.953946	0.890038	0.856383	0.776045	0.741951	0.610716	0.494221	0.403619	0.266504	0.187999
T (°C)	300	t (ks)	0	0.01	0.02	0.04	0.08	0.16	0.32	0.64	1.28	2.56	5.12	10.24
Ḋ (Gy/s)	0	Lx/Tx	0.824007	0.72361	0.680754	0.592975	0.513221	0.364763	0.2667	0.170013	0.108276	0.0519975	0.0366677	0.00895544
T (°C)	350	t (ks)	0	0.01	0.02	0.04	0.08	0.16	0.32	0.64
Ḋ (Gy/s)	0	Lx/Tx	0.54431	0.383234	0.27077	0.199278	0.11167	0.0676474	0.0392546	0.0172754
T (°C)	15	t (ks)	1.341	17.648	23.665	35.711	59.78	1.341
Ḋ (Gy/s)	0	Lx/Tx	0.951812	0.906509	0.906799	0.890661	0.888511	0.921745
T (°C)	15	t (ks)	1.34	19.137	25.154	37.201	61.274	1.341
Ḋ (Gy/s)	0	Lx/Tx	0.928241	0.889228	0.874149	0.896545	0.867986	0.962268
T (°C)	15	t (ks)	1.34	20.629	26.644	38.692	62.767	1.341
Ḋ (Gy/s)	0	Lx/Tx	0.983862	0.930257	0.874963	0.878335	0.891517	0.960945

## Sheet: KRG06 IR150
Sample KRG06
Natural T (°C)
Natural Ḋ (Gy/ka)			5.44	0.123
Lab calibration:
T (°C)	15	t (ks)	Nat	0	0.25	0.5	1.5	3	6	12	24	48	0	0.25
Ḋ (Gy/s)	0.105	Lx/Tx	1.04012	-0.0011311	0.273386	0.536207	1.33505	2.246	3.62628	5.04537	6.60872	7.53596	0.0151147	0.277877
T (°C)	15	t (ks)	Nat	0	0.25	0.5	1.5	3	6	12	24	48	0	0.25
Ḋ (Gy/s)	0.105	Lx/Tx	1.11623	0.0020088	0.280423	0.523892	1.32365	2.17682	3.43665	4.76628	5.89026	6.87993	0.0164278	0.286101
T (°C)	15	t (ks)	Nat	0	0.25	0.5	1.5	3	6	12	24	48	0	0.25
Ḋ (Gy/s)	0.105	Lx/Tx	1.04045	0.00332299	0.279737	0.503888	1.29745	2.19012	3.50333	4.85399	6.2284	6.86316	0.0121583	0.264316
T (°C)	170	t (ks)	0	0.01	0.02	0.04	0.08	0.16	0.32	0.64	1.28	2.56	5.12	10.24
Ḋ (Gy/s)	0	Lx/Tx	0.930783	0.96401	0.921708	0.935901	0.923188	0.977509	0.926613	0.914791	0.939973	0.905088	0.861874	0.872225
T (°C)	190	t (ks)	0	0.01	0.02	0.04	0.08	0.16	0.32	0.64	1.28	2.56	5.12	10.24
Ḋ (Gy/s)	0	Lx/Tx	0.928797	0.917274	0.935398	0.98234	0.953534	0.947802	0.909108	0.901194	0.87157	0.919042	0.84798	0.842388
T (°C)	210	t (ks)	0	0.01	0.02	0.04	0.08	0.16	0.32	0.64	1.28	2.56	5.12	10.24
Ḋ (Gy/s)	0	Lx/Tx	0.888464	0.931174	0.937118	0.958269	0.88823	0.934453	0.938982	0.888504	0.849041	0.873886	0.774288	0.713304
T (°C)	230	t (ks)	0	0.01	0.02	0.04	0.08	0.16	0.32	0.64	1.28	2.56	5.12	10.24
Ḋ (Gy/s)	0	Lx/Tx	0.943	0.978366	0.899457	0.963359	0.938023	0.950351	0.89976	0.834218	0.809121	0.764339	0.62302	0.545918
T (°C)	250	t (ks)	0	0.01	0.02	0.04	0.08	0.16	0.32	0.64	1.28	2.56	5.12	10.24
Ḋ (Gy/s)	0	Lx/Tx	0.904934	0.912435	0.942129	0.920844	0.868201	0.851	0.817568	0.756182	0.649138	0.606568	0.444279	0.351132
T (°C)	300	t (ks)	0	0.01	0.02	0.04	0.08	0.16	0.32	0.64	1.28	2.56	5.12	10.24
Ḋ (Gy/s)	0	Lx/Tx	0.907462	0.846616	0.828689	0.713776	0.6412	0.522683	0.477123	0.351567	0.249612	0.173239	0.12153	0.063188
T (°C)	350	t (ks)	0	0.01	0.02	0.04	0.08	0.16	0.32	0.64
Ḋ (Gy/s)	0	Lx/Tx	0.622142	0.508506	0.453304	0.36925	0.284671	0.201029	0.131312	0.0701086
T (°C)	15	t (ks)	1.501	17.808	23.825	35.871	59.941	1.502
Ḋ (Gy/s)	0	Lx/Tx	0.933268	0.922993	0.916777	0.9352	0.906728	0.955012
T (°C)	15	t (ks)	1.501	19.298	25.315	37.362	61.435	1.502
Ḋ (Gy/s)	0	Lx/Tx	0.951357	0.932496	0.929132	0.923262	0.900806	0.94353
T (°C)	15	t (ks)	1.501	20.79	26.805	38.853	62.928	1.503
Ḋ (Gy/s)	0	Lx/Tx	0.9532	0.912208	0.902375	0.93132	0.873915	0.95193

## Sheet: KRG06 IR225
Sample KRG06
Natural T (°C)
Natural Ḋ (Gy/ka)			5.44	0.123
Lab calibration:
T (°C)	15	t (ks)	Nat	0	0.25	0.5	1.5	3	6	12	24	48	0	0.25
Ḋ (Gy/s)	0.105	Lx/Tx	1.22661	0.0117555	0.266482	0.518267	1.23202	2.00109	3.10975	4.21823	5.16084	5.7938	0.0284063	0.271656
T (°C)	15	t (ks)	Nat	0	0.25	0.5	1.5	3	6	12	24	48	0	0.25
Ḋ (Gy/s)	0.105	Lx/Tx	1.28686	0.00623302	0.261207	0.521267	1.24989	1.98435	2.96449	3.96492	4.82432	5.35956	0.0279624	0.28162
T (°C)	15	t (ks)	Nat	0	0.25	0.5	1.5	3	6	12	24	48	0	0.25
Ḋ (Gy/s)	0.105	Lx/Tx	1.25007	0.00626454	0.278666	0.523048	1.25193	2.04352	3.08327	4.19171	5.12483	5.60769	0.0230665	0.272757
T (°C)	170	t (ks)	0	0.01	0.02	0.04	0.08	0.16	0.32	0.64	1.28	2.56	5.12	10.24
Ḋ (Gy/s)	0	Lx/Tx	0.902113	0.905526	0.904097	0.924306	0.904969	0.89317	0.909536	0.894669	0.888178	0.889844	0.883986	0.857866
T (°C)	190	t (ks)	0	0.01	0.02	0.04	0.08	0.16	0.32	0.64	1.28	2.56	5.12	10.24
Ḋ (Gy/s)	0	Lx/Tx	0.930399	0.889399	0.857914	0.907979	0.901566	0.896109	0.902867	0.880623	0.871719	0.875713	0.834215	0.791152
T (°C)	210	t (ks)	0	0.01	0.02	0.04	0.08	0.16	0.32	0.64	1.28	2.56	5.12	10.24
Ḋ (Gy/s)	0	Lx/Tx	0.897278	0.896137	0.881512	0.903145	0.885809	0.893402	0.891178	0.874973	0.836433	0.822254	0.769132	0.712311
T (°C)	230	t (ks)	0	0.01	0.02	0.04	0.08	0.16	0.32	0.64	1.28	2.56	5.12	10.24
Ḋ (Gy/s)	0	Lx/Tx	0.949072	0.894763	0.867871	0.893831	0.889658	0.880267	0.831351	0.826935	0.76831	0.732675	0.69838	0.613921
T (°C)	250	t (ks)	0	0.01	0.02	0.04	0.08	0.16	0.32	0.64	1.28	2.56	5.12	10.24
Ḋ (Gy/s)	0	Lx/Tx	0.911914	0.903501	0.897167	0.867258	0.852625	0.8554	0.777845	0.733404	0.659516	0.635938	0.547187	0.482739
T (°C)	300	t (ks)	0	0.01	0.02	0.04	0.08	0.16	0.32	0.64	1.28	2.56	5.12	10.24
Ḋ (Gy/s)	0	Lx/Tx	0.827675	0.810907	0.805281	0.727416	0.674151	0.616109	0.54748	0.452171	0.4349	0.337418	0.265279	0.198916
T (°C)	350	t (ks)	0	0.01	0.02	0.04	0.08	0.16	0.32	0.64
Ḋ (Gy/s)	0	Lx/Tx	0.678008	0.59818	0.539277	0.497645	0.424017	0.360135	0.284675	0.202333
T (°C)	15	t (ks)	1.686	17.994	24.011	36.056	60.127	1.688
Ḋ (Gy/s)	0	Lx/Tx	0.90275	0.890725	0.901689	0.888163	0.914055	0.936864
T (°C)	15	t (ks)	1.686	19.483	25.5	37.547	61.621	1.688
Ḋ (Gy/s)	0	Lx/Tx	0.89927	0.918896	0.878999	0.901285	0.877856	0.901287
T (°C)	15	t (ks)	1.686	20.975	26.99	39.038	63.114	1.688
Ḋ (Gy/s)	0	Lx/Tx	0.928764	0.897695	0.895036	0.902341	0.883924	0.913893

## Sheet: KRG101 IR50
Sample KRG101
Natural T (°C)
Natural Ḋ (Gy/ka)			5.539	0.127
Lab calibration:
T (°C)	15	t (ks)	Nat	0	0.25	0.5	1.5	3	6	12	24	48	0	0.25
Ḋ (Gy/s)	0.134112	Lx/Tx	0.82355	0.000611986	0.322097	0.58972	1.289	2.00132	2.79661	3.58798	4.24641	4.61687	0.00658842	0.319435
T (°C)	15	t (ks)	Nat	0	0.25	0.5	1.5	3	6	12	24	48	0	0.25
Ḋ (Gy/s)	0.134112	Lx/Tx	0.772467	0.000434701	0.32616	0.581041	1.30546	1.99172	2.8394	3.66206	4.34634	4.75475	0.0054544	0.316379
T (°C)	15	t (ks)	Nat	0	0.25	0.5	1.5	3	6	12	24	48	0	0.25
Ḋ (Gy/s)	0.134112	Lx/Tx	0.791261	0.000896149	0.332256	0.58948	1.27039	1.94664	2.75845	3.64501	4.23755	4.56656	0.0064475	0.322382
T (°C)	170	t (ks)	0	0.01	0.02	0.04	0.08	0.16	0.32	0.64	1.28	2.56	5.12	10.24
Ḋ (Gy/s)	0	Lx/Tx	0.984	0.982	0.969	0.967	0.967	0.952	0.934	0.908	0.884	0.844	0.804	0.746
T (°C)	190	t (ks)	0	0.01	0.02	0.04	0.08	0.16	0.32	0.64	1.28	2.56	5.12	10.24
Ḋ (Gy/s)	0	Lx/Tx	0.975	0.969	0.957	0.97	0.96	0.937	0.923	0.88	0.843	0.772	0.698	0.608
T (°C)	210	t (ks)	0	0.01	0.02	0.04	0.08	0.16	0.32	0.64	1.28	2.56	5.12	10.24
Ḋ (Gy/s)	0	Lx/Tx	0.974	0.968	0.96	0.95	0.933	0.909	0.871	0.809	0.719	0.611	0.496	0.381
T (°C)	230	t (ks)	0	0.01	0.02	0.04	0.08	0.16	0.32	0.64	1.28	2.56	5.12	10.24
Ḋ (Gy/s)	0	Lx/Tx	0.953	0.943	0.934	0.922	0.879	0.82	0.742	0.629	0.503	0.371	0.261	0.171
T (°C)	250	t (ks)	0	0.01	0.02	0.04	0.08	0.16	0.32	0.64	1.28	2.56	5.12	10.24
Ḋ (Gy/s)	0	Lx/Tx	0.941	0.909	0.886	0.832	0.752	0.648	0.517	0.385	0.265	0.168	0.098	0.055
T (°C)	300	t (ks)	0	0.01	0.02	0.04	0.08	0.16	0.32	0.64	1.28	2.56	5.12	10.24
Ḋ (Gy/s)	0	Lx/Tx	0.687	0.522	0.419	0.31	0.207	0.123	0.066	0.032	0.014	0.006	0.003	0.001
T (°C)	350	t (ks)	0	0.08	0.16	0.32	0.64
Ḋ (Gy/s)	0	Lx/Tx	0.195	0.012	0.005	0.001	0
T (°C)	15	t (ks)	1.204	13.052	19.074	31.111	55.185	1.203
Ḋ (Gy/s)	0	Lx/Tx	0.988889	0.877651	0.887416	0.867158	0.82223	0.991951
T (°C)	15	t (ks)	1.203	14.555	20.578	32.618	56.695	1.203
Ḋ (Gy/s)	0	Lx/Tx	0.972909	0.889268	0.889179	0.8472	0.799009	0.983267
T (°C)	15	t (ks)	1.204	16.056	22.084	34.126	58.203	1.204
Ḋ (Gy/s)	0	Lx/Tx	0.991018	0.877946	0.877047	0.86482	0.810366	1.00025

[truncated: 28 more sheets: KRG101 IR100, KRG101 IR150, KRG101 IR225, KRG104 IR50, KRG104 IR100, KRG104 IR150, KRG104 IR225, KRG111 IR50, KRG111 IR100, KRG111 IR150, KRG111 IR225, KRG112 IR50, KRG112 IR100, KRG112 IR150, KRG112 IR225, KRG16-05, KRG16-05Ti, KRG16-06, KRG16-06Ti, KRG16-101 …]
